# Supplementary material
Source: bioRxiv or medRxiv preprint supplement (http://medrxiv.stage.highwire.org/highwire/filestream/84483/field_highwire_adjunct_files/3/2020.06.03.20118570-4.pdf)
Supplement: Supplementary file [file 2020.06.03.20118570-4.pdf]

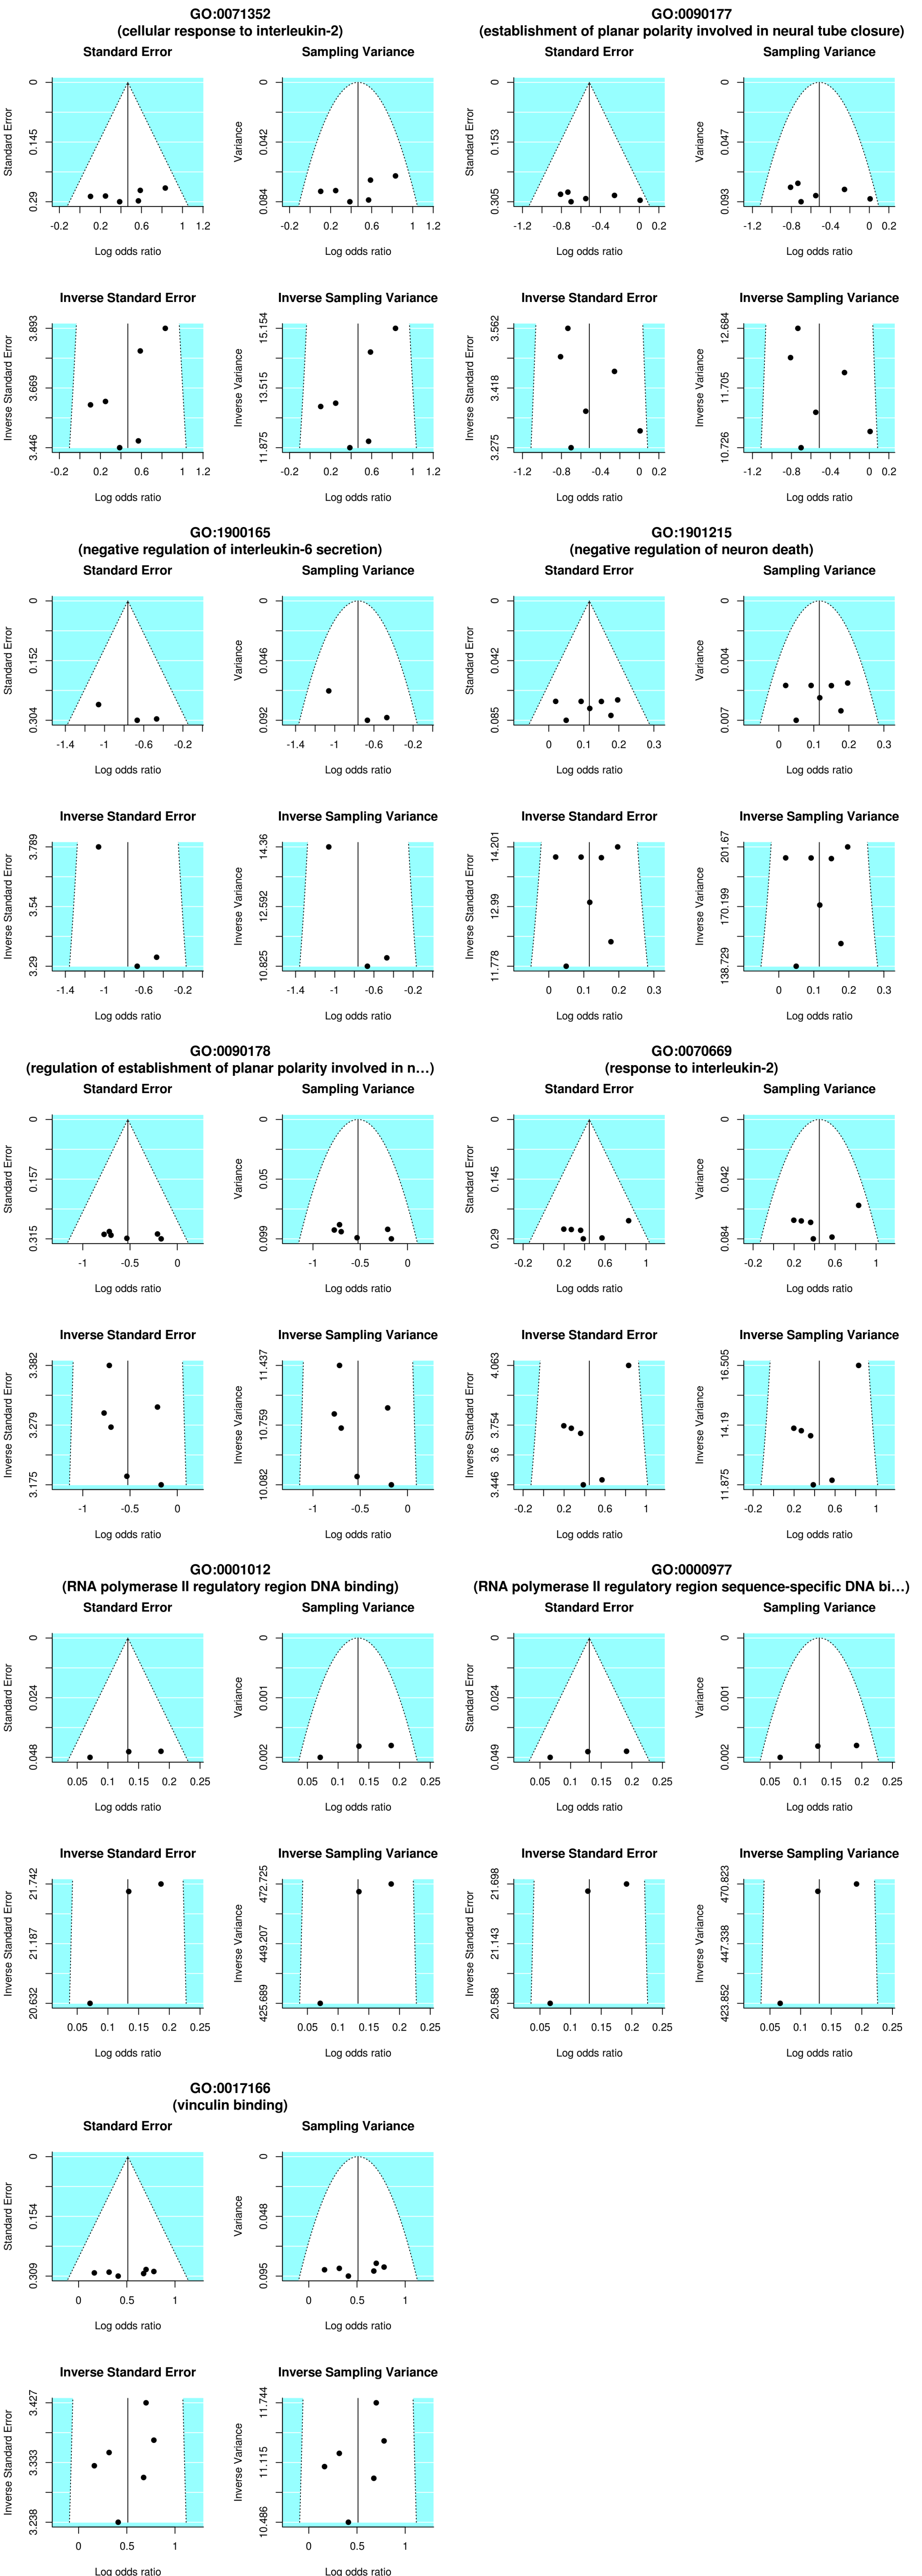

**Supplementary Figure 4. Funnel plots of the significant GO terms from our functional gene meta-analysis.** In the absence of bias and heterogeneity, we would expect the points to be distributed in the form of a funnel, within the region of confidence.
